# Supplementary material for: Prominent positioning and food swaps are effective interventions to reduce the saturated fat content of the shopping basket in an experimental online supermarket: a randomized controlled trial
Source: PubMed Central journal article supplement (PMC6555993; doi:10.1186/s12966-019-0810-9), 2019-06-07
Supplement: 12966_2019_810_MOESM2_ESM.pdf [file 12966_2019_810_MOESM2_ESM.pdf]

## Additional file 2: Supplementary tables

**Table S1** Time spent on the supermarket platform and number of items browsed and bought.

|                                                      | Mean (SD)          |                  |                              |                     | Mean Difference (95% Confidence interval) |                                 |                          |                               |                         |                                  |
|------------------------------------------------------|--------------------|------------------|------------------------------|---------------------|-------------------------------------------|---------------------------------|--------------------------|-------------------------------|-------------------------|----------------------------------|
|                                                      | Control<br>(n=276) | Swaps<br>(n=279) | Altering<br>order<br>(n=261) | Combined<br>(n=273) | Swaps vs<br>Control                       | Altering<br>order vs<br>Control | Combined vs<br>Control   | Altering<br>order vs<br>Swaps | Combined vs<br>Swaps    | Combined vs<br>Altering<br>order |
| <b>Time (min)<br/>spent on the<br/>supermarket</b>   | 14.2<br>(6.8)      | 16.4<br>(8.4)    | 17.2<br>(7.9)                | 17.5<br>(7.8)       | 2.2<br>(0.5 to 3.9)                       | 3.0<br>(1.3 to 4.7)             | 3.3<br>(1.6 to 5.0)      | 0.8<br>(-0.9 to 2.5)          | 1.1<br>(-0.6 to 2.8)    | 0.3<br>(-1.5 to 2.0)             |
| <b>N shelf and<br/>product<br/>pages<br/>browsed</b> | 25.48<br>(12.77)   | 28.08<br>(15.13) | 30.93<br>(14.96)             | 30.18<br>(15.58)    | 2.6<br>(-0.6 to 5.8)                      | 5.45<br>(2.19 to 8.71)          | 4.7<br>(1.48 to 7.92)    | 2.85<br>(-0.39 to 6.1)        | 2.1<br>(-1.11 to 5.31)  | -0.76<br>(-4.02 to 2.51)         |
| <b>N product<br/>pages<br/>browsed<sup>1</sup></b>   | 0 (0)              | 0 (0.5)          | 0 (1)                        | 0 (0)               | -0.02<br>(-0.54 to 0.49)                  | 0.21<br>(-0.32 to 0.73)         | -0.04<br>(-0.56 to 0.48) | 0.23<br>(-0.29 to 0.76)       | -0.02<br>(-0.54 to 0.5) | -0.25<br>(-0.78 to 0.28)         |
| <b>N products<br/>bought</b>                         | 11.41<br>(4.16)    | 12.37<br>(6.67)  | 11.26<br>(3.94)              | 11.62<br>(5.75)     | 0.95<br>(-0.2 to 2.11)                    | -0.15<br>(-1.33 to 1.02)        | 0.21<br>(-0.95 to 1.37)  | -1.11<br>(-2.28 to 0.06)      | -0.74<br>(-1.9 to 0.41) | 0.37<br>(-0.81 to 1.54)          |

<sup>1</sup>These data are presented as median (interquartile range) with median differences between groups.

**Table S2** Main effects and test for interaction

|                                        | <b>Swaps</b>      | <b>No Swaps</b>  | <b>Altering order</b> | <b>No Altering order</b> | <b>Swaps: Yes vs No</b> | <b>Altering: Yes vs No</b> | <b>P Interaction</b> |
|----------------------------------------|-------------------|------------------|-----------------------|--------------------------|-------------------------|----------------------------|----------------------|
|                                        | (n=552)           | (n=536)          | (n=534)               | (n=554)                  |                         |                            |                      |
| <b>Primary outcome</b>                 |                   |                  |                       |                          |                         |                            |                      |
| <i>SFA (% kcal)</i>                    | 22<br>(6.47)      | 23.25<br>(6.46)  | 20.48<br>(6.37)       | 24.67<br>(5.92)          | -1.25 (-2.02 to -0.48)  | -4.2 (-4.93 to -3.47)      | 0.04                 |
| <b>Secondary outcomes</b>              |                   |                  |                       |                          |                         |                            |                      |
| <i>% of products with &lt;1.5% SFA</i> | 28.35<br>(15.37)  | 25.5<br>(15.23)  | 31.65<br>(16.05)      | 22.41<br>(13.18)         | 2.85 (1.03 to 4.67)     | 9.25 (7.5 to 10.99)        | 0.17                 |
| <i>Cost (£/100g)</i>                   | 0.37<br>(0.11)    | 0.36<br>(0.11)   | 0.36<br>(0.11)        | 0.36<br>(0.12)           | 0.01 (-0.01 to 0.02)    | 0 (-0.02 to 0.01)          | 0.77                 |
| <i>Total energy (kcal)</i>             | 13541<br>(7793)   | 13484<br>(6578)  | 12562<br>(6799)       | 14430<br>(7490)          | 57 (-802 to 916)        | -1868 (-2720 to -1016)     | 0.73                 |
| <i>Energy density (kcal/g)</i>         | 201.05<br>(46.37) | 207.2<br>(48.28) | 192.7<br>(45.15)      | 215.05<br>(46.97)        | -6.14 (-11.77 to -0.51) | -22.35 (-27.83 to -16.86)  | 0.48                 |
| <i>Sugar (% energy)</i>                | 16.59<br>(5.53)   | 16.51<br>(5.86)  | 17.74<br>(6.16)       | 15.41<br>(4.95)          | 0.08 (-0.6 to 0.76)     | 2.33 (1.67 to 3)           | 0.77                 |
| <i>Salt (g/100g)</i>                   | 0.15<br>(0.07)    | 0.15<br>(0.1)    | 0.14<br>(0.06)        | 0.15<br>(0.11)           | -0.01 (-0.02 to 0.01)   | -0.01 (-0.02 to 0)         | 0.46                 |

The first four columns include mean (SD), the next 2 columns show mean difference and 95% CIs.

**Table S3** Change in % energy from saturated fat of the basket by number of swaps accepted (Table based on Figure 3)

|                                       | Swaps alone         |     | Combined            |     | Median difference<br>(95% CI) |
|---------------------------------------|---------------------|-----|---------------------|-----|-------------------------------|
|                                       | Median (IQR)        | n   | Median (IQR)        | n   |                               |
| <b>SFA (% kcal) per accepted swap</b> |                     |     |                     |     |                               |
| <b>Accepted 0 swap</b>                |                     |     |                     |     |                               |
| <i>Before</i>                         | 24.3 (20.9 - 27.6)  | 103 | 18.1 (13.6 - 22.57) | 164 | 6.24 (4.63 to 7.67)           |
| <i>After</i>                          | 24.3 (20.9 - 27.6)  | 103 | 18.1 (13.6 - 22.57) | 164 | 6.24 (4.66 to 7.72)           |
| <i>Difference</i>                     | 0.0 (0 - 0)         | 103 | 0.0 (0 - 0)         | 164 | 0.00 (0 to 0)                 |
| <b>Accepted 1 swap</b>                |                     |     |                     |     |                               |
| <i>Before</i>                         | 23.5 (20.2 - 26.44) | 71  | 19.6 (16.7 - 22.8)  | 77  | 3.95 (1.86 to 5.38)           |
| <i>After</i>                          | 23.1 (19.1 - 25.63) | 71  | 18.8 (15.3 - 21.95) | 77  | 4.30 (1.82 to 5.27)           |
| <i>Difference</i>                     | 0.8 (0.4 - 1.38)    | 71  | 0.7 (0.3 - 1.36)    | 77  | 0.04 (-0.17 to 0.31)          |
| <b>Accepted 2+ swaps</b>              |                     |     |                     |     |                               |
| <i>Before</i>                         | 24.4 (21 - 26.79)   | 105 | 19.5 (16.4 - 24.18) | 32  | 4.85 (1.57 to 5.81)           |
| <i>After</i>                          | 21.6 (19.1 - 24.6)  | 105 | 18.7 (13.7 - 22.45) | 32  | 2.92 (1.11 to 5.4)            |
| <i>Difference</i>                     | 1.8 (1.1 - 2.98)    | 105 | 1.8 (1.1 - 2.63)    | 32  | -0.01 (-0.42 to 0.69)         |

In the combination group, only 148 were offered at least 1 swap out of the 164 that accepted 0 swaps (i.e. 16 people were not offered any swap).

**Table S4** Subgroup analysis between intervention groups

|                             | Between group mean difference (95% confidence intervals) |                           |                        |
|-----------------------------|----------------------------------------------------------|---------------------------|------------------------|
|                             | Swaps vs Control                                         | Altering order vs Control | Combined vs Control    |
| <b>Sex</b>                  |                                                          |                           |                        |
| <i>Female</i>               | -1.28 (-2.92 to 0.35)                                    | -4.32 (-5.97 to -2.68)    | -4.47 (-6.12 to -2.81) |
| <i>Male</i>                 | -3.27 (-5.56 to -0.99)                                   | -6.22 (-8.62 to -3.82)    | -7.09 (-9.37 to -4.81) |
| <b>Age</b>                  |                                                          |                           |                        |
| <i>Median and above</i>     | -2.84 (-4.77 to -0.91)                                   | -4.21 (-6.17 to -2.24)    | -4.71 (-6.69 to -2.74) |
| <i>Below median</i>         | -1.05 (-2.88 to 0.79)                                    | -5.77 (-7.63 to -3.92)    | -6.02 (-7.83 to -4.22) |
| <b>Ethnic group</b>         |                                                          |                           |                        |
| <i>White</i>                | -1.89 (-3.3 to -0.48)                                    | -4.85 (-6.28 to -3.42)    | -5.44 (-6.87 to -4.02) |
| <i>Non-White</i>            | -2.8 (-7.38 to 1.78)                                     | -6.3 (-11.1 to -1.5)      | -5.09 (-9.36 to -0.82) |
| <b>BMI</b>                  |                                                          |                           |                        |
| <30                         | -2.14 (-3.72 to -0.56)                                   | -5.75 (-7.39 to -4.12)    | -5.22 (-6.79 to -3.65) |
| >30                         | -1.83 (-4.33 to 0.68)                                    | -3.32 (-5.81 to -0.84)    | -6.05 (-8.67 to -3.43) |
| <b>Education</b>            |                                                          |                           |                        |
| <i>None/Secondary</i>       | -1.57 (-4.09 to 0.95)                                    | -5.03 (-7.57 to -2.49)    | -5.2 (-7.86 to -2.53)  |
| <i>Higher</i>               | -2.06 (-3.67 to -0.46)                                   | -4.76 (-6.4 to -3.12)     | -5.45 (-7.01 to -3.88) |
| <b>Household income</b>     |                                                          |                           |                        |
| <i>Low-middle (£25-39k)</i> | -2.21 (-3.82 to -0.59)                                   | -5.06 (-6.69 to -3.43)    | -5.61 (-7.25 to -3.97) |
| <i>Higher (£40k+)</i>       | -1.34 (-3.8 to 1.13)                                     | -4.53 (-7.11 to -1.96)    | -4.6 (-7.05 to -2.15)  |

**Table S5** Post-task survey on the most important factors affecting choice of purchase of foods or drinks by trial arm (n, %).

| When making a choice of foods or drinks to buy, what are the top 3 things that affect your decision? |                |    |              |    |                       |    |             |    |              |    |  |
|------------------------------------------------------------------------------------------------------|----------------|----|--------------|----|-----------------------|----|-------------|----|--------------|----|--|
| <b>N %</b>                                                                                           | <b>Control</b> |    | <b>Swaps</b> |    | <b>Altering order</b> |    | <b>Both</b> |    | <b>Total</b> |    |  |
| Price                                                                                                | 216            | 70 | 252          | 81 | 207                   | 67 | 232         | 75 | 907          | 73 |  |
| Taste <sup>1</sup>                                                                                   | 209            | 67 | 233          | 75 | 217                   | 70 | 214         | 69 | 873          | 70 |  |
| Healthiness                                                                                          | 70             | 23 | 99           | 32 | 84                    | 27 | 93          | 30 | 346          | 28 |  |
| Special offers                                                                                       | 86             | 28 | 84           | 27 | 54                    | 17 | 101         | 33 | 325          | 26 |  |
| Habits                                                                                               | 87             | 28 | 61           | 20 | 82                    | 26 | 59          | 19 | 289          | 23 |  |
| Convenience                                                                                          | 86             | 28 | 52           | 17 | 72                    | 23 | 63          | 20 | 273          | 22 |  |
| Appearance                                                                                           | 54             | 17 | 37           | 12 | 43                    | 14 | 39          | 13 | 173          | 14 |  |
| Organic                                                                                              | 8              | 3  | 4            | 1  | 7                     | 2  | 7           | 2  | 26           | 2  |  |
| Special diet <sup>1</sup>                                                                            | 1              | 0  | 5            | 2  | 4                     | 1  | 1           | 0  | 11           | 1  |  |
| Other <sup>2</sup>                                                                                   | 13             | 4  | 8            | 3  | 12                    | 4  | 16          | 5  | 49           | 4  |  |

<sup>1</sup> Theirs or their families', <sup>2</sup> e.g. animal welfare, locally produced, packaging.

**Table S6** Post-task survey on the frequency of checking the nutrition labelling while at usual grocery shopping

| How often do you look at the nutrition labels for the following, when doing your usual grocery shop? |              |               |                  |              |               |                |
|------------------------------------------------------------------------------------------------------|--------------|---------------|------------------|--------------|---------------|----------------|
| <b>N (%)</b>                                                                                         | <b>Never</b> | <b>Rarely</b> | <b>Sometimes</b> | <b>Often</b> | <b>Always</b> | <b>Missing</b> |
| Calories                                                                                             | 142 (13.1)   | 219 (20.1)    | 356 (32.7)       | 271 (24.9)   | 91 (8.4)      | 9 (0.8)        |
| Fat                                                                                                  | 135 (12.4)   | 258 (23.7)    | 382 (35.1)       | 240 (22.1)   | 64 (5.9)      | 9 (0.8)        |
| Saturated fat                                                                                        | 180 (16.5)   | 303 (27.8)    | 333 (30.6)       | 202 (18.6)   | 61 (5.6)      | 9 (0.8)        |
| Sugar                                                                                                | 120 (11)     | 212 (19.5)    | 342 (31.4)       | 302 (27.8)   | 103 (9.5)     | 9 (0.8)        |
| Salt                                                                                                 | 180 (16.5)   | 365 (33.5)    | 292 (26.8)       | 183 (16.8)   | 59 (5.4)      | 9 (0.8)        |
